# Supplementary material
Source: MDPI journal article supplement (https://www.mdpi.com/1424-2818/10/4/120)

**A**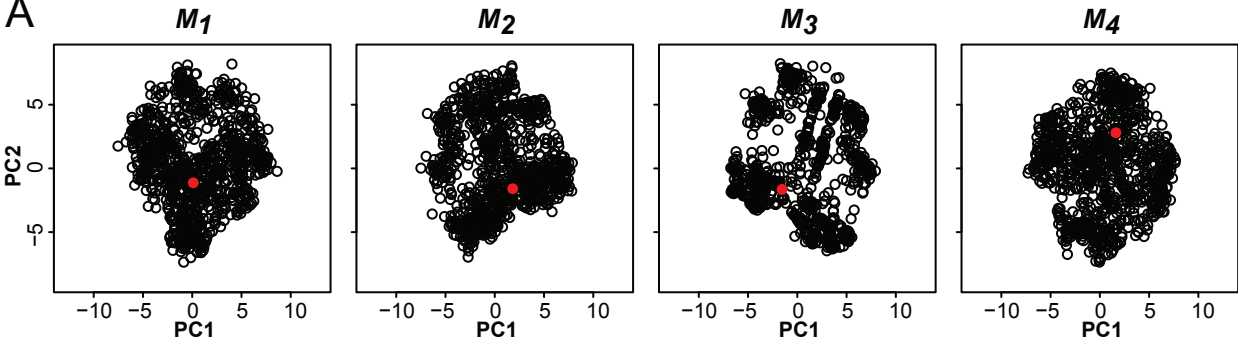**B**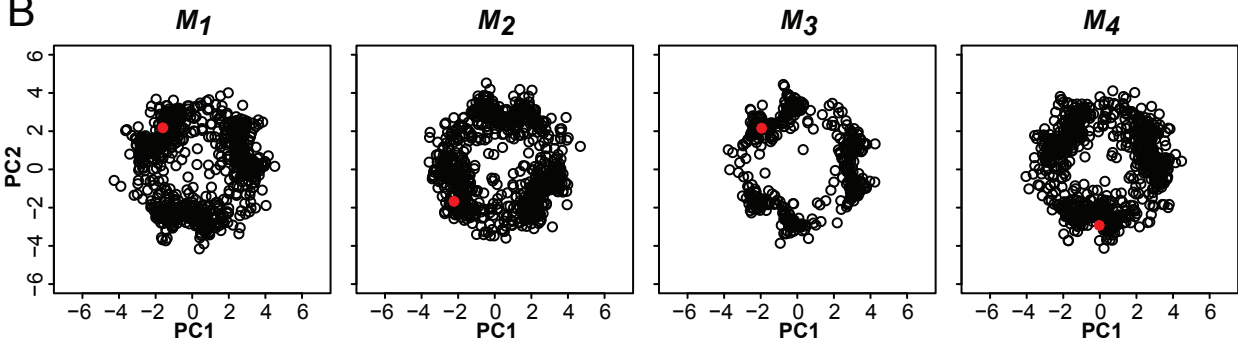

Supplement: s1 [file s1]

past

Time

present

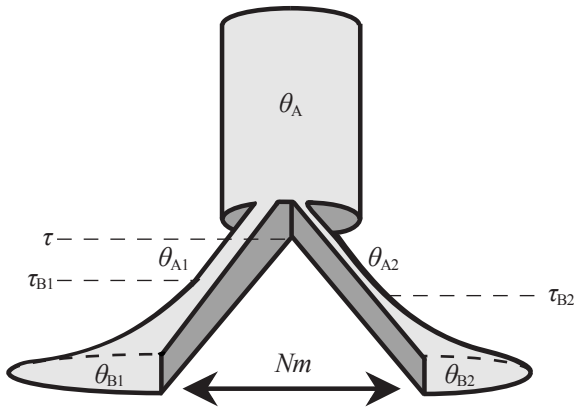

Supplement: s1 [file s1]
